# Supplementary material for: Peroxymonosulfate Activation by CuO-Fe2O3-Modified Ni Foam: A 1O2 Dominated Process for Efficient and Stable Degradation of Tetracycline
Source: MDPI journal article supplement (doi:10.3390/catal13020329), 2023-02-02
Supplement: s1 [file s1]

# Peroxymonosulfate Activation by CuO-Fe<sub>2</sub>O<sub>3</sub>-Modified Ni Foam: A <sup>1</sup>O<sub>2</sub> Dominated Process for Efficient and Stable Degradation of Tetracycline

Xueqing Ren <sup>1</sup>, Peng Xu <sup>2,\*</sup>, Ke Tian <sup>1</sup>, Menghan Cao <sup>1</sup>, Fengyin Shi <sup>1</sup> and Guangshan Zhang <sup>1,\*</sup>

<sup>1</sup> College of Resource and Environment, Qingdao Engineering Research Center for Rural Environment, Qingdao Agricultural University, Qingdao 266109, China

<sup>2</sup> State Key Laboratory of Urban Water Resource and Environment, School of Environment, Harbin Institute of Technology, Harbin 150090, China

\* Correspondence: 18636284364@163.com (P.X.); gszhang@qau.edu.cn (G.Z.); Tel./Fax: +86-1556-1566-038 (P.X.); +86-532-5895-7461 (G.Z.)

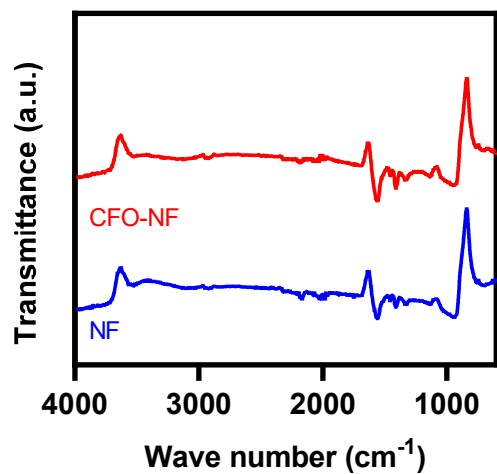

**Figure. S1.** FTIR spectra of NF and CFO-NF.

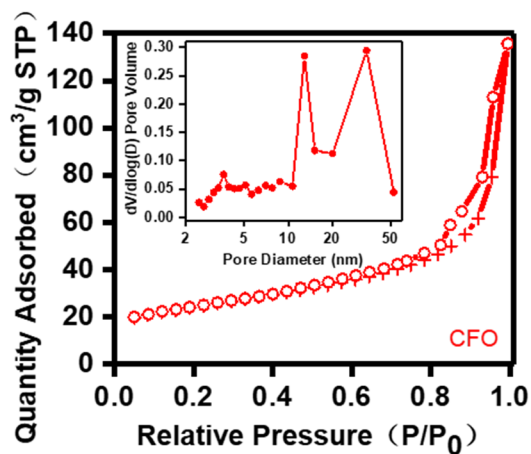

**Figure. S2.** N<sub>2</sub> adsorption/desorption isotherms of CFO scratched from CFO-NF (insert: Barrett-Joyner-Halenda (BJH) analyzes).

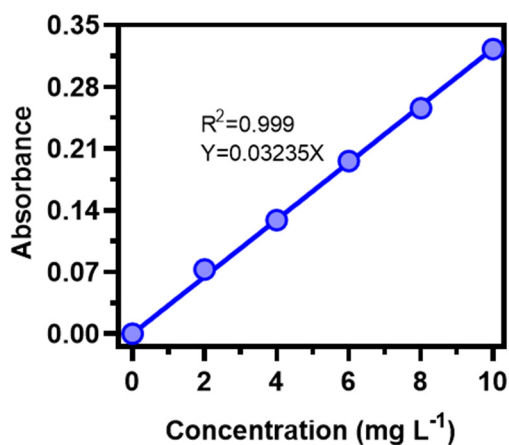

**Figure. S3.** The standard curve of TC.

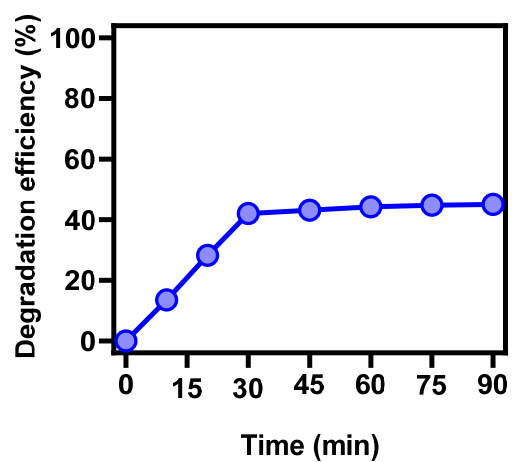

**Figure. S4.** The adsorption performance of CFO-NF towards TC.

**Table S1.** Specific surface areas and pore characteristics of different catalysts.

| Catalysts | $S_{\text{BET}} (\text{m}^2 \text{g}^{-1})$ | Pore volume ( $\text{cm}^3 \text{g}^{-1}$ ) | Pore size (nm) |
|-----------|---------------------------------------------|---------------------------------------------|----------------|
| CFO       | 81.80                                       | 0.192                                       | 14.91          |
| NF        | 3.87                                        | 0.0033                                      | 5.77           |
| CFO-NF    | 4.25                                        | 0.0040                                      | 5.13           |

**Table S2.** The content of various elements in fresh and used catalysts.

|       | Fe(II) | Fe(III) | Cu(I)  | Cu(II) | Ni(II) | Ni(III) | Ni <sup>0</sup> | O <sub>v</sub> | O <sub>lat</sub> |
|-------|--------|---------|--------|--------|--------|---------|-----------------|----------------|------------------|
| Fresh | 0      | 100%    | 0%     | 100%   | 66.2%  | 29.2%   | 4.6%            | 74.2%          | 25.8%            |
| Used  | 36.1%  | 63.9%   | 78.6%  | 21.4%  | 35.1%  | 54.6%   | 10.2%           | 46.7%          | 27.0%            |
| △     | +36.1% | -36.1%  | +78.6% | -78.6% | -31.1% | +25.4%  | +5.6%           | -27.5%         | +1.2%            |
